# Supplementary material for: The Effect of Different Factors on Poly(lactic-co-glycolic acid) Nanoparticle Properties and Drug Release Behaviors When Co-Loaded with Hydrophilic and Hydrophobic Drugs
Source: MDPI journal article supplement (doi:10.3390/polym16070865), 2024-03-22
Supplement: s1 [file s1]

# **The Effect of Different Factors on Poly(lactic-co-glycolic acid) Nanoparticle Properties and Drug Release Behaviors When Co-Loaded with Hydrophilic and Hydrophobic Drugs**

Lianguo Wang <sup>1,2,3,†</sup>, Pei Wang <sup>1,2,3,\*</sup>, Yifan Liu <sup>1,2,3</sup>, Muhammad Atae Mustafa Mahayyudin <sup>1,2,3</sup>, Rong Li <sup>1,2,3</sup>, Weilun Zhang <sup>1,2,3</sup>, Yilan Zhan <sup>1,2,3</sup> and Zhihua Li <sup>1,2,3</sup>

*<sup>1</sup> School of Stomatology, Jiangxi Medical College, Nanchang University, Nanchang 330006, China;*

*guoguo19990713@163.com (L.W.); lyf070626@163.com (Y.L.);*

*413009220060@email.ncu.edu.cn (M.A.M.M.); lirong012@email.ncu.edu.cn (R.L.);*

*4207122044@email.ncu.edu.cn (W.Z.); 4207120011@email.ncu.edu.cn (Y.Z.);*

*lwlq323@163.com (Z.L.)*

*<sup>2</sup> Jiangxi Province Key Laboratory of Oral Biomedicine, Nanchang 330006, China*

*<sup>3</sup> Jiangxi Province Clinical Research Center for Oral Diseases, Nanchang 330006, China*

**\*Correspondence:** ndfskqyy620@ncu.edu.cn

**†** These authors contributed equally to this work.

## Supplementary Material

### 1 Supplementary Figures

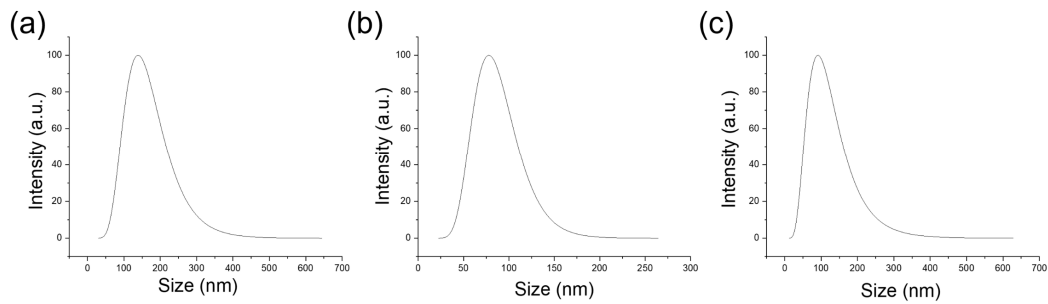

**Supplementary Figure S1.** Size distribution of PLGA NPs prepared in different organic phases (a) DCM, (b) EA and (c) PC under 2% BSA concentration and 4 mL water phase.

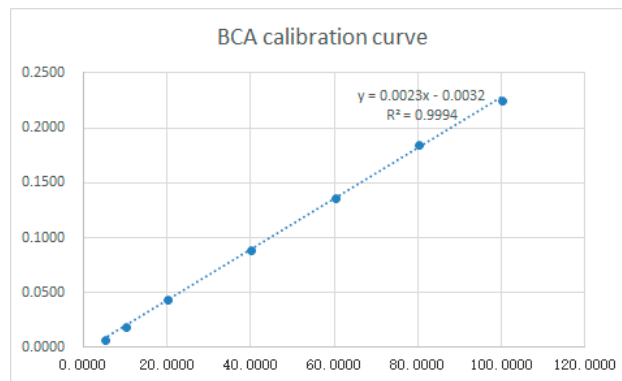

**Supplementary Figure S2.** Standard curve of BSA

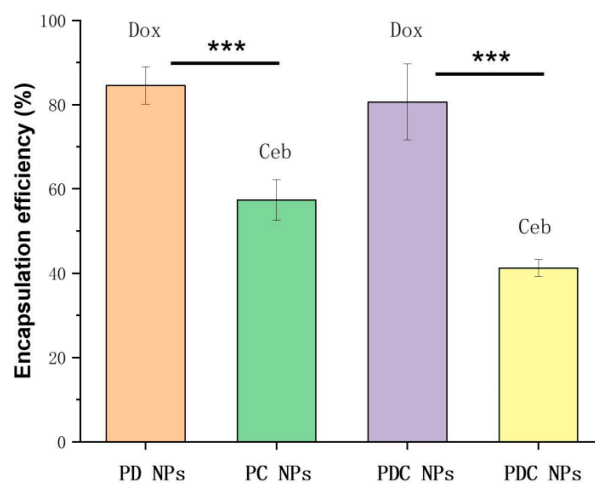

**Supplementary Figure S3.** The encapsulation efficiency of PD NPs, PC NPs and PDC NPs. \*\*\* $P < 0.001$ .
